# Supplementary material for: Traditional Knowledge of the Utilization of Edible Insects in Nagaland, North-East India
Source: MDPI journal article supplement (doi:10.3390/foods9070852), 2020-06-30
Supplement: s1 [file s1]

**QUESTIONNAIRE FORMAT (by Lobeno Mozhui & L.N.Kakati)**

Name of the informant: \_\_\_\_\_

Age:

|                                |                                |                                |
|--------------------------------|--------------------------------|--------------------------------|
| <input type="checkbox"/> 25-34 | <input type="checkbox"/> 35-44 | <input type="checkbox"/> 45-54 |
| <input type="checkbox"/> 55-64 | <input type="checkbox"/> 65-74 | <input type="checkbox"/> 75-84 |
| <input type="checkbox"/> 85-94 | <input type="checkbox"/> 95+   |                                |

Sex:

☐ Male

☐ Female

Community: \_\_\_\_\_ Local dialect: \_\_\_\_\_

Qualification:

☐ Below high school

☐ Above high school

Occupation:

☐ Government servant

☐ Farmer

☐ Unemployed

Informant:

☐ Key informant

☐ General informant

Contact No.: \_\_\_\_\_ Strength of family: \_\_\_\_\_

Place of interview:

a. Name of place/ village: \_\_\_\_\_

b. Location/ District: \_\_\_\_\_

c. Other details: \_\_\_\_\_

d. Signature: \_\_\_\_\_

1. Do you eat insects?

☐ Yes

☐ No

2. If yes, can you name the edible insects consumed by you?

| Sl. no | Common name | Local name | Seasonal availability | Edible stage | Mode of consumption | Therapeutic value | Myths/ Folklore |
|--------|-------------|------------|-----------------------|--------------|---------------------|-------------------|-----------------|
| 1      |             |            |                       |              |                     |                   |                 |
| 2      |             |            |                       |              |                     |                   |                 |
| 3      |             |            |                       |              |                     |                   |                 |
| 4      |             |            |                       |              |                     |                   |                 |
| 5      |             |            |                       |              |                     |                   |                 |

3. If no, can you name the edible insects consumed by others?

a. Local name of the insects: \_\_\_\_\_

b. Name of the tribe consuming the insects: \_\_\_\_\_

c. Edible parts: \_\_\_\_\_

d. Edible stage: \_\_\_\_\_

e. Habitat of the insects: **Terrestrial/Aquatic/Burrowing**

f. Time of collection: \_\_\_\_\_

g. Seasonal availability: \_\_\_\_\_

h. Mode of collection: \_\_\_\_\_

i. Mode of preparation and consumption: \_\_\_\_\_

4. Are there any indigenous methods for capturing insects?

☐ Yes

☐ No

5. If yes, can you name them and explain in details?

6. Are chemicals used for capturing insects?

☐ Yes

☐ No

7. If yes,

a. Name of the chemical: \_\_\_\_\_

b. Name of the insect captured: \_\_\_\_\_

8. Do you preserve the edible insects for future consumption?

☐ **Yes**

☐ **No**

9. If yes, then how are they preserved?

☐ **Fermented**

☐ **Smoked**

☐ **Sundried**

☐ **As Pickle**

Others: \_\_\_\_\_

10. Is entomophagy (insect consumption) popular in the region?

☐ **Yes**

☐ **No**

11. If yes, what are the most popular edible insects? Name them.

12. How often do you take/consume insects?

☐ **Everyday**

☐ **Once in a week**

☐ **Several days in a week**

☐ **Never**

13. Are insects reared?

☐ **Yes**

☐ **No**

14. If yes, name of the reared insects and technique used for domestication?

15. Are insects marketed?

☐ Yes

☐ No

16. If yes,

a. Name of the marketing place: \_\_\_\_\_

b. Name of the insects sold at the markets: \_\_\_\_\_

c. Rate of the edible insects: \_\_\_\_\_

17. What are the insect and insect products sold by you? **(For insect farmers/sellers)**

a. Name of the insect/ insect product: \_\_\_\_\_

b. Rate of selling: \_\_\_\_\_

c. Quantity of insects sold per day: \_\_\_\_\_

d. Income on weekly basis (in rupees):

☐ 0- 5,000/-

☐ 5,001-10,000/-

☐ Above 10,000/-

18. Are insects used for cultural practices?

☐ Yes

☐ No

19. If yes, name of the insects used and how?

20. Are there any insect based folk stories in your community?

☐ Yes

☐ No

21. If yes, narrate the story.

22. Do you prefer insects over meat?

☐ Yes

☐ No

a. If yes, name of the insects preferred and why?

b. If no, why do you believe meat is better?

23. Are edible insects used in animal feed?

☐ **Yes**

☐ **No**

24. If yes,

a. Name of the insect used: \_\_\_\_\_

b. Mode of preparation: \_\_\_\_\_

25. Are edible insects used as baits?

☐ **Yes**

☐ **No**

26. If yes,

a. Name of the insect used: \_\_\_\_\_

b. Mode of use: \_\_\_\_\_

27. Do you manage insect pest for your cultivated crops?

☐ **Yes**

☐ **No**

28. If yes,

a. Chemical or non-chemical: \_\_\_\_\_

b. Regular or irregular use: \_\_\_\_\_

29. Are there any measures initiated to conserve edible insects?

☐ **Yes**

☐ **No**

30. If yes,

a. Name of the community/organization: \_\_\_\_\_

b. Methods used for conservation: \_\_\_\_\_

31. Give your feedback on availability of edible insects in the region.

☐ **Increased**

☐ **Decreased**

32. Does the younger generation practice entomophagy?

☐ **Yes**

☐ **No**

33. How important are insects according to you?

Date of collecting information \_\_\_\_\_

Place of collecting information \_\_\_\_\_

Name of enumerator \_\_\_\_\_
